# Supplementary material
Source: publisher figshare collection journal article supplement (https://gsapubs.figshare.com/ndownloader/files/25019030)
Supplement: Supplementary file 1 [file 25019030]

## Sheet: ZG-15m
Aliquot Name	ZG-15m
Stratigraphic Formation Name	Kootenai Fm (Lower clastic member)
Stratigraphic Age	Lower Cretaceous
Rock Type	Medium- to coarse-grained lithic sandstone
Mineral	Zircon
Method	U-Pb
Latitude	45.4671
Longitude	-112.574
Internal Uncertainty Level	one sigma
External Uncertainty 206/238 (% two sigma)	0.889472
External Uncertainty 206/207 (% two sigma)	1.03097
Analysis Purpose	MDA
Laboratory Name	Arizona LaserChron Center
Aliquot Instrumental Method	LA-ICPMS
Aliquot Instrumental Reference	Gehrels, G.E., Valencia, V., Ruiz, J., 2008, Enhanced precision, accuracy, efficiency, and spatial resolution of U-Pb ages by laser ablation-multicollector-inductively coupled plasma-mass spectrometry: Geochemistry, Geophysics, Geosystems, v. 9, Q03017, doi:10.1029/2007GC001805.
				Isotope ratios							Apparent ages (Ma)
Analysis	U	206Pb	U/Th	206Pb*	±	207Pb*	±	206Pb*	±	error	206Pb*	±	207Pb*	±	206Pb*	±	Best age	±	Conc	Long axis	Short axis	Sphericity
	(ppm)	204Pb		207Pb*	(%)	235U	(%)	238U	(%)	corr.	238U	(Ma)	235U	(Ma)	207Pb*	(Ma)	(Ma)	(Ma)	(%)
Grains used to calculate MDAs
ZG-15-457	654.316	6816.08	2.64551	18.3186	3.76694	0.152408	10.8998	0.0211506	1.18546	0.10876	134.924	0.791422	144.036	7.31854	297.882	123.682	134.924	0.791422	45.2943	0.085	0.073	0.858824
ZG-15-384	892.229	7761.77	1.40404	19.338	2.37102	0.144712	8.69544	0.0212118	1.76709	0.20322	135.31	1.18306	137.232	5.58089	171.611	99.4125	135.31	1.18306	78.8469	0.156	0.095	0.608974
ZG-15-43	481.582	5756.63	3.4539	17.888	4.20136	0.156783	12.5112	0.0213458	1.80858	0.144557	136.156	1.21833	147.883	8.60903	341.309	140.272	136.156	1.21833	39.8922	0.15	0.108	0.72
ZG-15-356	145.402	1835.64	2.74551	12.6721	12.9918	0.21015	30.9576	0.0213615	4.90481	0.158437	136.255	3.30646	193.679	27.3	968.364	313.626	136.255	3.30646	14.0706	0.145	0.086	0.593103
ZG-15-300	608.192	4598.79	2.27181	17.3158	4.77836	0.161166	10.9112	0.0214053	1.50473	0.137907	136.531	1.01641	151.724	7.68886	397.141	121.188	136.531	1.01641	34.3785	0.141	0.069	0.489362
																						0.654053
Grains filtered out as part of negatively-skewed tail
ZG_15M 93	83.4531	782.953	3.4528	9.82131	11.166	0.233648	18.3854	0.0202633	4.19353	0.22809	129.32	5.36904	213.206	35.3712	1284.73	351.414	129.32	5.36904	10.0659
Grains that do not overlap concordia within their 1-sigma error
ZG_15M 342	496.956	5612.99	3.39664	16.1338	3.93059	0.172274	4.78868	0.0210165	1.10093	0.229902	134.077	1.46085	161.39	7.14568	584.564	101.211	134.077	1.46085	22.9363

## Sheet: ZG-150m
Aliquot Name	ZG-150m
Stratigraphic Formation Name	Kootenai Fm (Lower limestone member)
Stratigraphic Age	Lower Cretaceous
Rock Type	Limestone
Mineral	Zircon
Method	U-Pb
Latitude	45.4681
Longitude	-112.577
Internal Uncertainty Level	one sigma
External Uncertainty 206/238 (% two sigma)	1.0766
External Uncertainty 206/207 (% two sigma)	0.753081
Analysis Purpose	MDA
Laboratory Name	Arizona LaserChron Center
Aliquot Instrumental Method	LA-ICPMS
Aliquot Instrumental Reference	Gehrels, G.E., Valencia, V., Ruiz, J., 2008, Enhanced precision, accuracy, efficiency, and spatial resolution of U-Pb ages by laser ablation-multicollector-inductively coupled plasma-mass spectrometry: Geochemistry, Geophysics, Geosystems, v. 9, Q03017, doi:10.1029/2007GC001805.
				Isotope ratios							Apparent ages (Ma)
Analysis	U	206Pb	U/Th	206Pb*	±	207Pb*	±	206Pb*	±	error	206Pb*	±	207Pb*	±	206Pb*	±	Best age	±	Conc	Long axis	Short axis	Sphericity
	(ppm)	204Pb		207Pb*	(%)	235U	(%)	238U	(%)	corr.	238U	(Ma)	235U	(Ma)	207Pb*	(Ma)	(Ma)	(Ma)	(%)
Grains used to calculate MDAs
ZG-150-8	134.936	14289.9	2.14041	16.987	23.5654	0.133453	24.6404	0.0165414	7.07896	0.287291	105.761	7.42568	127.196	29.4663	549.059	522.043	105.761	7.42568	19.2622	0.08	0.052	0.65
ZG-150-3	129.449	2398.5	4.41614	26.5121	48.4486	0.0738824	49.6552	0.0168454	5.87257	0.118267	107.688	6.27152	72.377	34.7015	NA	NA	107.688	6.27152		0.095	0.061	0.642105
ZG-150-1	265.296	10498.2	12.7889	20.5256	18.4359	0.115144	18.9288	0.0174593	4.11055	0.217159	111.579	4.54703	110.66	19.8481	90.9336	NA	111.579	4.54703	122.704	0.135	0.071	0.525926
ZG-150-10	166.07	5278.64	1.9233	18.3271	39.4526	0.12617	40.0062	0.0174854	6.18661	0.154641	111.744	6.85361	120.65	45.5407	299.972	NA	111.744	6.85361	37.2516	0.128	0.062	0.484375
ZG-150-24	157.426	3901.85	2.07561	15.3949	23.2412	0.150157	24.4206	0.0176368	6.96443	0.285186	112.703	7.78092	142.051	32.3835	665.428	507.714	112.703	7.78092	16.9369	0.054	0.044	0.814815
ZG-150-5	630.572	16547.9	2.59862	20.1042	5.92545	0.120615	6.19271	0.0177041	1.69307	0.273398	113.129	1.89865	115.629	6.76801	167.371	139.288	113.129	1.89865	67.592	0.102	0.069	0.676471
ZG-150-12	149.337	3826.54	1.37409	24.469	43.8387	0.0919854	44.2214	0.0178504	4.30478	0.097346	114.056	4.86669	89.3512	37.8413	NA	NA	114.056	4.86669		0.065	0.054	0.830769
ZG-150-15	1235.66	9190.74	16.0634	20.7849	4.41153	0.116816	4.77175	0.0180431	1.40015	0.293424	115.276	1.59969	112.181	5.06794	46.977	NA	115.276	1.59969	245.388	0.121	0.065	0.53719
ZG-150-19	94.6255	6664.52	2.11444	27.1398	66.0165	0.0872758	66.7106	0.0181347	8.83499	0.132437	115.856	10.1445	84.9625	54.4246	NA	NA	115.856	10.1445		0.072	0.035	0.486111
ZG-150-20	215.397	4692.75	1.83153	22.7929	22.846	0.103016	23.462	0.0181941	3.89976	0.166216	116.233	4.49219	99.5566	22.2529	NA	NA	116.233	4.49219		0.109	0.072	0.66055
ZG-150-13	595.091	20041.4	1.75931	21.9648	8.97187	0.115974	9.18942	0.0185656	1.7975	0.195605	118.584	2.11206	111.415	9.697	NA	NA	118.584	2.11206		0.093	0.058	0.623656
ZG-150-14	125.219	2165.52	1.7941	17.6705	21.4061	0.129638	23.4264	0.0186765	7.4076	0.316207	119.286	8.75497	123.772	27.3044	210.861	NA	119.286	8.75497	56.5709	0.096	0.065	0.677083
																						0.634088
Grains filtered out as part of negatively-skewed tail
ZG-150-22	450.366	2322.74	0.690347	22.9787	20.7603	0.0620081	22.701	0.0120217	6.87549	0.302872	77.0345	5.26498	61.0871	13.4593	NA	NA	77.0345	5.26498
Grains that do not overlap concordia within their 1-sigma error
ZG-150-17	117.803	1433.61	3.217	28.4097	31.6803	0.0615794	36.8587	0.0179867	7.75416	0.210375	114.919	8.83205	60.6771	21.713	NA	NA	114.919	8.83205

## Sheet: ZG-186m
Aliquot Name	ZG-186m
Stratigraphic Formation Name	Kootenai Fm (Upper clastic member)
Stratigraphic Age	Lower Cretaceous
Rock Type	Sandstone
Mineral	Zircon
Method	U-Pb
Latitude	45.4685
Longitude	-112.578
Internal Uncertainty Level	one sigma
External Uncertainty 206/238 (% two sigma)	0.977255
External Uncertainty 206/207 (% two sigma)	1.07485
Analysis Purpose	MDA
Laboratory Name	Arizona LaserChron Center
Aliquot Instrumental Method	LA-ICPMS
Aliquot Instrumental Reference	Gehrels, G.E., Valencia, V., Ruiz, J., 2008, Enhanced precision, accuracy, efficiency, and spatial resolution of U-Pb ages by laser ablation-multicollector-inductively coupled plasma-mass spectrometry: Geochemistry, Geophysics, Geosystems, v. 9, Q03017, doi:10.1029/2007GC001805.
				Isotope ratios							Apparent ages (Ma)
Analysis	U	206Pb	U/Th	206Pb*	±	207Pb*	±	206Pb*	±	error	206Pb*	±	207Pb*	±	206Pb*	±	Best age	±	Conc	Long axis	Short axis	Sphericity
	(ppm)	204Pb		207Pb*	(%)	235U	(%)	238U	(%)	corr.	238U	(Ma)	235U	(Ma)	207Pb*	(Ma)	(Ma)	(Ma)	(%)
Grains used to calculate MDAs
ZG-150-484	49.9592	507.8	4.2615	4.70029	29.9892	0.431927	62.2345	0.0165302	14.6983	0.236176	105.689	7.70396	364.544	95.5875	2738.61	510.834	105.689	7.70396	3.85923	0.086	0.047	0.546512
ZG-150-481	139.471	1450.29	2.29672	14.0182	13.3603	0.140296	32.3029	0.0165333	6.62548	0.205105	105.709	3.4733	133.307	20.1802	659.21	340.847	105.709	3.4733	16.0357	0.085	0.059	0.694118
ZG-150-474	711.303	3399.04	2.81363	16.3824	4.53784	0.133418	12.9433	0.01703	3.43143	0.265112	108.858	1.85201	127.164	7.73532	485.502	137.87	108.858	1.85201	22.4218	0.059	0.047	0.79661
ZG-150-342	147.421	1591.09	5.27156	14.0114	9.73693	0.149746	22.1405	0.0173394	5.08921	0.22986	110.819	2.79581	141.687	14.641	696.815	230.176	110.819	2.79581	15.9037	0.063	0.058	0.920635
ZG-150-366	1725.45	17770.8	9.31541	19.7484	1.42899	0.119417	3.37989	0.0173926	1.31629	0.389447	111.156	0.725294	114.543	1.83053	186.513	36.243	111.156	0.725294	59.5967	0.226	0.067	0.29646
ZG-150-203	1138.7	5847.82	5.34784	19.4677	2.82042	0.118203	10.0307	0.0173947	1.68586	0.168069	111.169	0.929046	113.441	5.38324	162.402	115.677	111.169	0.929046	68.4533	0.094	0.07	0.744681
ZG-150-231	1094.09	10256.7	4.38201	19.2823	2.21859	0.12235	4.97766	0.0174578	1.74486	0.350539	111.569	0.964989	117.2	2.75487	234.117	53.8217	111.569	0.964989	47.6554	0.109	0.063	0.577982
ZG-150-405	940.692	13048.7	9.7624	18.7004	3.39452	0.127253	7.96872	0.0174709	1.55958	0.195713	111.652	0.863156	121.627	4.56708	322.366	88.7642	111.652	0.863156	34.6352	0.081	0.065	0.802469
ZG-150-84	1638.61	13631.9	9.07048	19.8397	2.58507	0.11917	5.54358	0.0174964	1.64221	0.296237	111.814	0.910195	114.319	2.99682	167.787	61.8529	111.814	0.910195	66.6406	0.078	0.071	0.910256
ZG-150-204	1317.76	13194.5	11.9973	19.5394	2.23946	0.121962	4.82782	0.0175121	1.27276	0.26363	111.913	0.706044	116.85	2.66441	219.615	53.8876	111.913	0.706044	50.9588	0.068	0.043	0.632353
ZG-150-459	1504.01	10254.6	13.3704	18.8697	2.57646	0.125176	6.54072	0.0175194	1.47333	0.225255	111.96	0.817646	119.754	3.69427	278.507	72.9556	111.96	0.817646	40.2	0.079	0.058	0.734177
ZG-150-430	218.399	2976.39	3.98229	13.6082	13.2585	0.167944	27.3659	0.0176077	2.54384	0.0929564	112.519	1.41873	157.633	19.9806	904.894	281.976	112.519	1.41873	12.4345	0.07	0.06	0.857143
ZG-150-323	840.3	9859.51	3.37623	19.6825	2.487	0.120636	5.60387	0.0176681	1.43711	0.25645	112.902	0.804198	115.649	3.06269	173.549	63.2163	112.902	0.804198	65.0545	0.091	0.054	0.593407
ZG-150-143	82.4185	871.279	5.37261	12.9361	11.9612	0.148995	31.6883	0.0177335	8.42443	0.265853	113.315	4.73138	141.024	20.8648	637.953	330.362	113.315	4.73138	17.7623	0.098	0.093	0.94898
ZG-150-451	176.11	2577.65	3.53731	12.7756	17.406	0.178516	37.515	0.0177459	4.26666	0.113732	113.394	2.39792	166.783	28.8578	1013.67	380.837	113.394	2.39792	11.1865	0.098	0.062	0.632653
ZG-150-241	1054.71	11153.4	14.8583	18.7222	2.61468	0.128536	6.09676	0.017843	1.6499	0.270618	114.009	0.932248	122.781	3.52541	297.196	66.9754	114.009	0.932248	38.3617	0.086	0.064	0.744186
ZG-150-279	792.148	8501.34	3.59017	17.745	4.55821	0.134371	9.68905	0.0178465	1.49939	0.154751	114.032	0.847371	128.018	5.82689	397.137	107.333	114.032	0.847371	28.7134	0.074	0.064	0.864865
ZG-150-575	106.301	1081.09	3.20093	10.862	11.4645	0.195212	33.8897	0.0178696	9.54876	0.28176	114.178	5.40329	181.067	28.1087	1178.77	323.566	114.178	5.40329	9.68619	0.067	0.061	0.910448
ZG-150-513	252.894	3139.93	3.05233	14.2563	8.76289	0.16263	21.7205	0.0179329	2.51201	0.115651	114.579	1.4264	153.003	15.4263	800.056	226.636	114.579	1.4264	14.3213	0.143	0.082	0.573427
ZG-150-462	485.285	6075.01	4.53849	17.6114	6.11647	0.134965	13.3091	0.017939	1.88634	0.141733	114.617	1.07149	128.55	8.03524	395.438	147.857	114.617	1.07149	28.9849	0.155	0.069	0.445161
ZG-150-152	156.595	2858.67	3.1465	10.5365	22.3642	0.224459	45.4746	0.0179659	5.16642	0.113611	114.787	2.93896	205.614	42.346	1439.28	436.25	114.787	2.93896	7.97533	0.093	0.065	0.698925
ZG-150-507	375.029	5059.72	4.89515	15.6258	8.49867	0.15235	17.4472	0.0180403	2.29982	0.131817	115.259	1.31359	143.985	11.7112	648.9	186.017	115.259	1.31359	17.7621	0.088	0.067	0.761364
ZG-150-282	480.849	5325.71	6.76926	17.0638	4.95932	0.139132	11.773	0.0180725	2.08759	0.17732	115.463	1.19446	132.27	7.30038	446.757	128.827	115.463	1.19446	25.8446	0.099	0.062	0.626263
ZG-150-182	178.042	2242.94	3.76052	13.87	8.20034	0.165536	24.6409	0.0181729	5.10951	0.207359	116.098	2.93947	155.537	17.7692	809.304	253.015	116.098	2.93947	14.3454	0.066	0.057	0.863636
ZG-150-289	806.023	8151.71	3.05424	19.8299	2.97052	0.122408	6.42999	0.0181919	1.95936	0.304722	116.219	1.12837	117.253	3.56017	139.293	71.8994	116.219	1.12837	83.4346	0.103	0.063	0.61165
ZG-150-328	983.796	8735.09	3.23429	19.3537	1.88968	0.127089	4.29193	0.0183375	1.35839	0.316498	117.14	0.788424	121.479	2.45699	208.302	47.2121	117.14	0.788424	56.2359	0.073	0.046	0.630137
ZG-150-195	203.908	2264.85	4.15886	15.3014	8.49927	0.15044	21.6482	0.0184064	5.13343	0.237129	117.576	2.99049	142.3	14.3731	578.269	229.093	117.576	2.99049	20.3324	0.099	0.053	0.535354
ZG-150-188	399.657	5602.49	4.40904	17.2789	5.8062	0.141989	13.7183	0.0185422	2.37302	0.172982	118.436	1.39242	134.814	8.65972	434.904	150.592	118.436	1.39242	27.2326	0.12	0.084	0.7
ZG-150-406	72.9188	977.098	3.84041	6.55326	28.994	0.36028	60.8892	0.0185974	10.5866	0.173867	118.785	6.23012	312.423	82.0533	2234.15	531.985	118.785	6.23012	5.3168	0.122	0.071	0.581967
ZG-150-332	61.4891	687.026	4.23651	7.38782	23.3104	0.307706	49.5845	0.0192055	12.7692	0.257524	122.633	7.75558	272.401	59.3013	1899.34	437.276	122.633	7.75558	6.45657	0.057	0.05	0.877193
																						0.703767
Grains that do not overlap concordia within their 1-sigma error
Spot 373	402.991	4952.99	2.23918	17.5447	3.72761	0.124762	4.11648	0.0159125	1.31188	0.318854	108.113	1.40756	120.282	4.67053	369.139	87.9458	108.113	1.40756	29.2879	106.705	109.521	2.20219
Spot 133	899.369	9035.03	2.11341	17.1329	4.94687	0.131889	5.24394	0.0159349	0.871767	0.166402	108.255	0.936927	126.691	6.2471	489.115	114.17	108.255	0.936927	22.1329	107.318	109.192	#REF!
Spot 477	404.858	4710.25	4.29053	15.4596	3.52636	0.145301	5.27828	0.0162021	1.51961	0.288032	109.949	1.65771	138.641	6.84164	664.089	108.359	109.949	1.65771	16.5563	108.291	111.606	3.42327
Spot 353	96.2254	1083.25	3.7248	9.88887	8.67754	0.210086	9.60347	0.0163385	2.39284	0.249243	110.813	2.63002	194.464	16.9992	1389.78	178.891	110.813	2.63002	7.97345	108.183	113.443	#REF!
Spot 382	674.779	6740.98	3.16304	17.2063	4.83414	0.133287	5.24025	0.0164182	0.864825	0.165194	111.318	0.955549	127.942	6.30058	449.934	114.905	111.318	0.955549	24.7411	110.363	112.274	10.716
Spot 224	27.3196	285.425	3.46982	4.8855	23.0542	0.387893	25.351	0.0164421	8.96773	0.353767	111.469	9.91146	333.561	72.1997	2474.32	406.534	111.469	9.91146	4.50506	101.558	121.381	#REF!
Spot 457	130.384	2550.11	4.00107	11.3772	15.1302	0.198593	15.8326	0.0165137	3.02151	0.190893	111.923	3.3537	184.782	26.7559	1261.9	305.497	111.923	3.3537	8.86947	108.57	115.277	#REF!
Spot 191	1427.91	22245.3	6.06062	18.72	2.89575	0.127351	3.2293	0.016541	0.885988	0.274584	112.096	0.985683	122.615	3.73104	332.775	70.4336	112.096	0.985683	33.6853	111.11	113.082	2.99624
Spot 290	224.686	2691.79	3.65326	13.9795	9.12021	0.159992	9.49425	0.0165781	2.01556	0.212376	112.331	2.2456	151.571	13.3701	820.724	194.142	112.331	2.2456	13.6868	110.085	114.577	12.6068
Spot 363	29.0848	545.369	3.4095	3.0446	11.7059	0.751562	15.6963	0.0165915	9.37279	0.597159	112.416	10.4463	569.71	68.5461	3522.93	195.208	112.416	10.4463	3.19098	101.97	122.862	#REF!
Spot 307	471.8	7413.65	2.81081	16.2298	5.43715	0.145316	6.44859	0.0166607	1.55497	0.24125	112.855	1.7407	138.654	8.35911	607.642	135.45	112.855	1.7407	18.5726	111.114	114.595	#REF!
Spot 17	50.7334	612.924	4.5687	7.05258	5.1315	0.292495	16.491	0.0166718	8.17486	0.495748	112.925	9.15221	261.307	38.0138	1963.7	256.894	112.925	9.15221	5.75063	103.773	122.077	10.1981
Spot 26	564.425	14039	3.66558	16.7269	3.07912	0.143225	3.46424	0.0166819	0.989803	0.285926	112.989	1.10974	136.8	4.43501	573.857	72.2363	112.989	1.10974	19.6894	111.879	114.099	#REF!
Spot 198	88.0825	1576.02	4.15935	8.03645	8.49591	0.284548	11.4142	0.0167682	3.94034	0.345272	113.535	4.43564	255.049	25.7511	1904.83	193.029	113.535	4.43564	5.9604	109.1	117.971	#REF!
Spot 535	322.524	5669.61	2.70424	15.8774	7.0803	0.147535	8.05532	0.0168528	1.61147	0.200149	114.071	1.82318	140.617	10.5795	616.79	170.658	114.071	1.82318	18.4943	112.248	115.894	3.35478
Spot 407	424.984	8084.23	2.4217	16.8963	3.73609	0.14156	4.75433	0.0168611	1.39991	0.294597	114.124	1.5847	135.322	6.02471	526.5	99.6644	114.124	1.5847	21.676	112.539	115.709	#REF!
Spot 520	754.858	9920.04	19.9345	17.5998	4.12494	0.136399	4.42815	0.0169391	0.875433	0.197878	114.618	0.99567	130.725	5.43282	435.368	96.7099	114.618	0.99567	26.3266	113.622	115.613	#REF!
Spot 76	327.376	9410.71	3.3445	15.8199	5.42567	0.152157	5.75681	0.0169939	1.28797	0.223865	114.965	1.46873	144.695	7.76503	665.757	120.262	114.965	1.46873	17.2683	113.496	116.433	#REF!
Spot 551	181.799	1771.24	3.51381	10.2469	15.1451	0.22361	15.3223	0.0171529	1.81476	0.118496	115.972	2.08694	205.739	28.5448	1420.79	292.465	115.972	2.08694	8.16247	113.885	118.059	#REF!
Spot 162	484.657	6646.75	4.27384	17.1725	2.59549	0.140988	3.5362	0.0172825	0.958401	0.271232	116.792	1.11041	134.813	4.46562	466.232	75.4465	116.792	1.11041	25.0502	115.682	117.902	#REF!
Spot 130	221.102	2510.73	3.59785	13.5556	8.24262	0.171851	9.9321	0.0173891	1.81692	0.183016	117.467	2.11611	161.89	14.8653	874.689	202.655	117.467	2.11611	13.4295	115.351	119.583	3.2077
Spot 59	390.636	3419.18	4.43016	15.7814	6.60133	0.149829	7.13512	0.0174024	1.00846	0.141458	117.551	1.17588	142.644	9.49684	584.328	153.525	117.551	1.17588	20.1173	116.375	118.727	#REF!
Spot 531	151.029	2439.92	2.87055	12.8006	12.5579	0.183061	13.6099	0.0174885	3.05199	0.224304	118.096	3.57263	171.549	21.4867	992.585	270.791	118.096	3.57263	11.8978	114.523	121.669	#REF!
Spot 419	311.936	2984.43	3.57571	12.6079	13.742	0.198698	14.0374	0.0182401	1.34775	0.0960755	122.851	1.64127	184.87	23.7317	1076.81	281.832	122.851	1.64127	11.4088	121.21	124.493	1.72069
Spot 134	395.002	5361.1	3.50097	14.6625	6.23349	0.174766	6.56723	0.0183803	0.787452	0.12004	123.738	0.966312	164.411	9.97026	800.176	136.753	123.738	0.966312	15.4639	122.772	124.705	124.705

## Sheet: ZG-271m
Aliquot Name	ZG-271m
Stratigraphic Formation Name	Kootenai Fm (Upper limestone member; gastropod limestone)
Stratigraphic Age	Lower Cretaceous
Rock Type	Limestone
Mineral	Zircon
Method	U-Pb
Latitude	45.4691
Longitude	-112.58
Internal Uncertainty Level	one sigma
External Uncertainty 206/238 (% two sigma)	1.02895
External Uncertainty 206/207 (% two sigma)	1.46962
Analysis Purpose	MDA
Laboratory Name	Arizona LaserChron Center
Aliquot Instrumental Method	LA-ICPMS
Aliquot Instrumental Reference	Gehrels, G.E., Valencia, V., Ruiz, J., 2008, Enhanced precision, accuracy, efficiency, and spatial resolution of U-Pb ages by laser ablation-multicollector-inductively coupled plasma-mass spectrometry: Geochemistry, Geophysics, Geosystems, v. 9, Q03017, doi:10.1029/2007GC001805.
				Isotope ratios							Apparent ages (Ma)
Analysis	U	206Pb	U/Th	206Pb*	±	207Pb*	±	206Pb*	±	error	206Pb*	±	207Pb*	±	206Pb*	±	Best age	±	Conc	Long axis	Short axis	Sphericity
	(ppm)	204Pb		207Pb*	(%)	235U	(%)	238U	(%)	corr.	238U	(Ma)	235U	(Ma)	207Pb*	(Ma)	(Ma)	(Ma)	(%)
Grains used to calculate MDAs
ZG-271-34	783.362	4954.02	1.69896	27.4752	19.6568	0.0773297	20.3553	0.0164945	4.46743	0.219473	105.463	4.67314	75.6313	14.8367	NA	NA	105.463	4.67314		0.076	0.04	0.526316
ZG-271-1	299.317	15302.4	3.6084	20.5768	18.2783	0.110685	20.6933	0.0166716	9.62712	0.465229	106.586	10.1768	106.592	20.942	106.738	NA	106.586	10.1768	99.8578	0.102	0.026	0.254902
ZG-271-10	322.901	10479	4.3685	21.8417	22.5661	0.104135	23.4782	0.0168803	6.25025	0.266215	107.909	6.68844	100.586	22.4875	NA	NA	107.909	6.68844		0.07	0.04	0.571429
ZG-271-17	276.812	3816.89	1.57249	27.3306	23.9211	0.0766017	24.4569	0.0169347	3.12353	0.127716	108.254	3.35311	74.9449	17.6709	NA	NA	108.254	3.35311		0.091	0.035	0.384615
ZG-271-7	186.338	4510	2.24457	22.6618	46.2238	0.0969027	46.6672	0.0170416	5.85813	0.12553	108.932	6.32774	93.9133	41.8847	NA	NA	108.932	6.32774		0.107	0.057	0.53271
ZG-271-27	208.008	2478.29	2.04214	13.6214	25.9887	0.163184	26.9686	0.0173636	6.45116	0.23921	110.972	7.09773	153.487	38.4349	873.441	551.34	110.972	7.09773	12.7052	0.09	0.022	0.244444
ZG-271-19	528.413	8682.45	2.17305	17.1267	12.3586	0.138188	14.0227	0.0175874	6.49974	0.463515	112.39	7.24176	131.429	17.2887	490.974	274.992	112.39	7.24176	22.8913	0.106	0.047	0.443396
ZG-271-37	966.21	9622.61	8.63508	22.8728	29.6526	0.104647	29.958	0.0177071	3.79473	0.126669	113.149	4.25623	101.056	28.8244	NA	NA	113.149	4.25623		0.099	0.057	0.575758
ZG-271-12	299.553	2165.99	2.63625	23.3992	30.1651	0.0890182	31.6466	0.0179061	4.5177	0.142755	114.409	5.12306	86.5884	26.2723	NA	NA	114.409	5.12306		0.095	0.036	0.378947
ZG-271-24	460.917	20134	2.63416	22.5252	12.092	0.111381	12.4225	0.0183686	2.76517	0.222593	117.337	3.21523	107.228	12.6418	NA	NA	117.337	3.21523		0.13	0.059	0.453846
																						0.436636
Grains filtered out as part of negatively-skewed tail
ZG-271-4	760.683	8258.97	3.99443	25.4052	23.185	0.0438263	24.9346	0.00837984	8.88975	0.356523	53.7948	4.76233	43.553	10.6305	NA	NA	53.7948	4.76233	NA
ZG-271-30	1476.12	28810.1	3.27348	21.2033	6.62805	0.0692141	7.73802	0.0106679	3.95812	0.511516	68.4055	2.69325	67.9534	5.0862	52.0685	NA	68.4055	2.69325	131.376
ZG-271-45	637.187	3761.05	1.80612	18.116	35.182	0.0769438	36.5097	0.0107706	9.52937	0.261009	69.0604	6.5459	75.2675	26.4922	277.158	NA	69.0604	6.5459	24.9174
ZG-271-43	1001.43	10151.3	1.06043	17.6857	26.6781	0.0862583	28.2874	0.0112397	9.28244	0.328148	72.0513	6.65089	84.0118	22.812	438.827	NA	72.0513	6.65089	16.4191
ZG-271-18	2345.42	70736.9	1.39865	20.7387	3.10948	0.0775005	3.47613	0.0116505	1.53913	0.442772	74.6701	1.14264	75.7923	2.53872	111.349	73.5886	74.6701	1.14264	67.0594
ZG-271-3	1051.42	37286.5	1.98557	21.7219	10.0088	0.0749145	10.3407	0.0117751	2.55148	0.246742	75.464	1.91423	73.3524	7.31778	5.04941	NA	75.464	1.91423	1494.51
ZG-271-31	1194.32	12160.2	0.942121	21.6187	7.9299	0.0798321	9.40416	0.0127445	4.91969	0.52314	81.6372	3.99097	77.9871	7.05957	NA	NA	81.6372	3.99097	NA

## Sheet: G48070
Finzel, E.S., and Rosenblume, J.A., 2020, Dating lacustrine carbonate strata with detrital zircon U-Pb geochronology: Geology, v. 49, https://doi.org/10.1130/G48070.1
